# Supplementary material for: Carbon-centered radicals add reversibly to histidine – implications
Source: Royal Society of Chemistry journal article supplement (doi:10.1039/c4cc05316h), 2014-01-01

# Carbon-Centered Radicals Add Reversibly to Histidine – Implications

## Supplementary Information

Thomas Nauser\* and Anna Carreras

Laboratorium für Anorganische Chemie, Departement für Chemie und Angewandte Biowissenschaften, ETH Zürich, Vladimir-Prelog Weg 2, CH-8093 Zürich, Switzerland. E-mail: [nauser@ethz.ch](mailto:nauser@ethz.ch)

**Fig. S1:** Absorption at 360 nm, 5  $\mu$ s after irradiation (50 Gy) of  $N_2O$  saturated aqueous solutions of 1 M *t*-BuOH containing variable amounts of HisNH<sub>2</sub>. The optical pathlength is 6 cm. The curve represents a fit for  $K_5 = 3 \times 10^3 \text{ M}^{-1}$  and  $\epsilon_{360\text{nm}}([\text{HisNH}_2 \cdots t\text{-BuOH}]^*) = 4 \times 10^2 \text{ M}^{-1}\text{cm}^{-1}$ . At  $[\text{HisNH}_2] > 3 \text{ mM}$  the absorption increases unexpectedly.

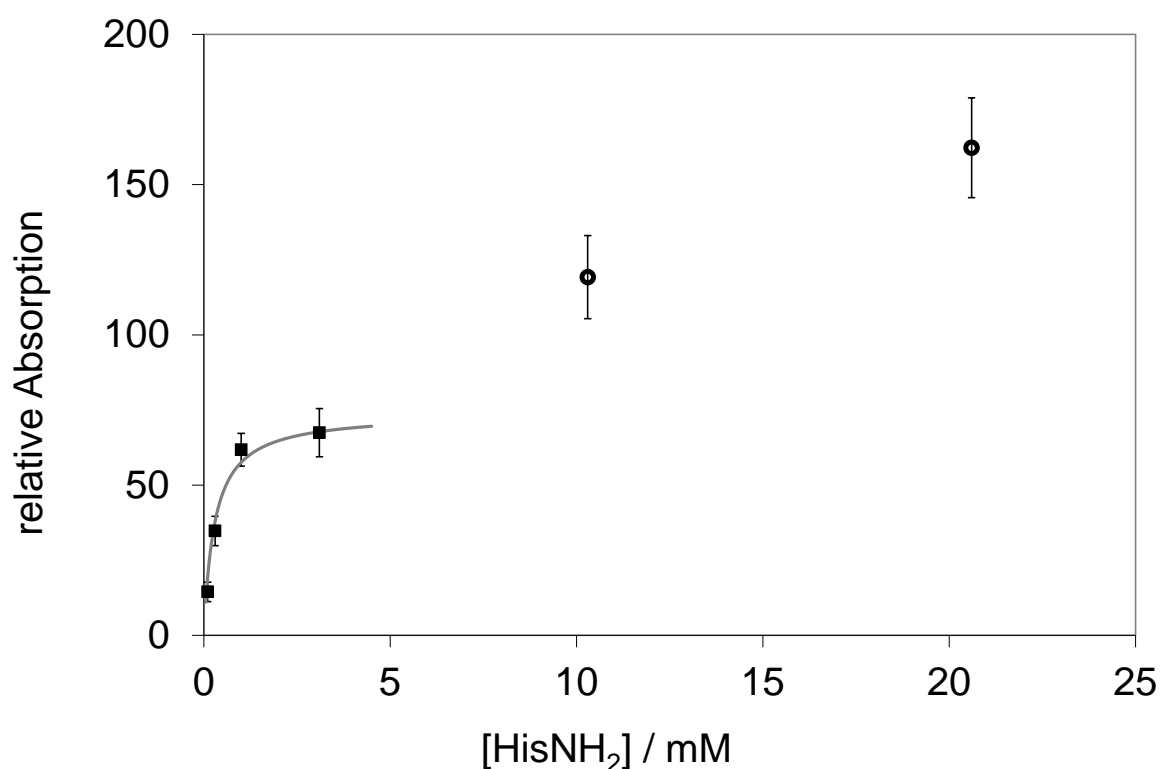

**Fig. S2:** Plot of  $1/k_{\text{obs}}$  vs.  $[\text{HisNH}_2]$  for the decay of absorption after irradiation (50 Gy) of  $\text{N}_2\text{O}$  saturated aqueous solutions of 1 M  $t\text{-BuOH}$  containing variable amounts of  $\text{HisNH}_2$ . Because we are using absorption data and not concentration data, the observed rate constant ( $k_{\text{obs}}$ ) is dependent both on the difference in molar absorptivity between products and reactants ( $\Delta\epsilon$ ) and the optical pathlength ( $l$ ),  $k_{\text{obs}} = 2k_{2,0}/(\Delta\epsilon \times l)$ . Due to equilibrium 5, the second order rate constant  $k_{2,0}$  is dependent on the availability of free  $t\text{-BuOH}$ :  $k_{2,0} = k_6/(1+K_5[\text{HisNH}_2])$ . With  $k_{\text{obs}} \times \Delta\epsilon \times l = 2k_6/(1+K_5[\text{HisNH}_2])$ , a plot  $1/k_{\text{obs}}$  vs.  $[\text{HisNH}_2]$  follows the equation  $y = ((1+K_5[\text{HisNH}_2]) \times \Delta\epsilon \times l) / 2k_6$ . So, slope =  $K_5 \times \Delta\epsilon \times l / 2k_6$ , offset =  $\Delta\epsilon \times l / 2k_6$  and  $K_5 = \text{slope}/\text{offset}$ . We find  $K_5 \approx 4 \times 10^3 \text{ M}^{-1}$  at low concentrations. At  $[\text{HisNH}_2] \approx 3 \text{ mM}$ , the slope changes distinctly and the chemical reactions responsible for the absorbance decay must change, too.

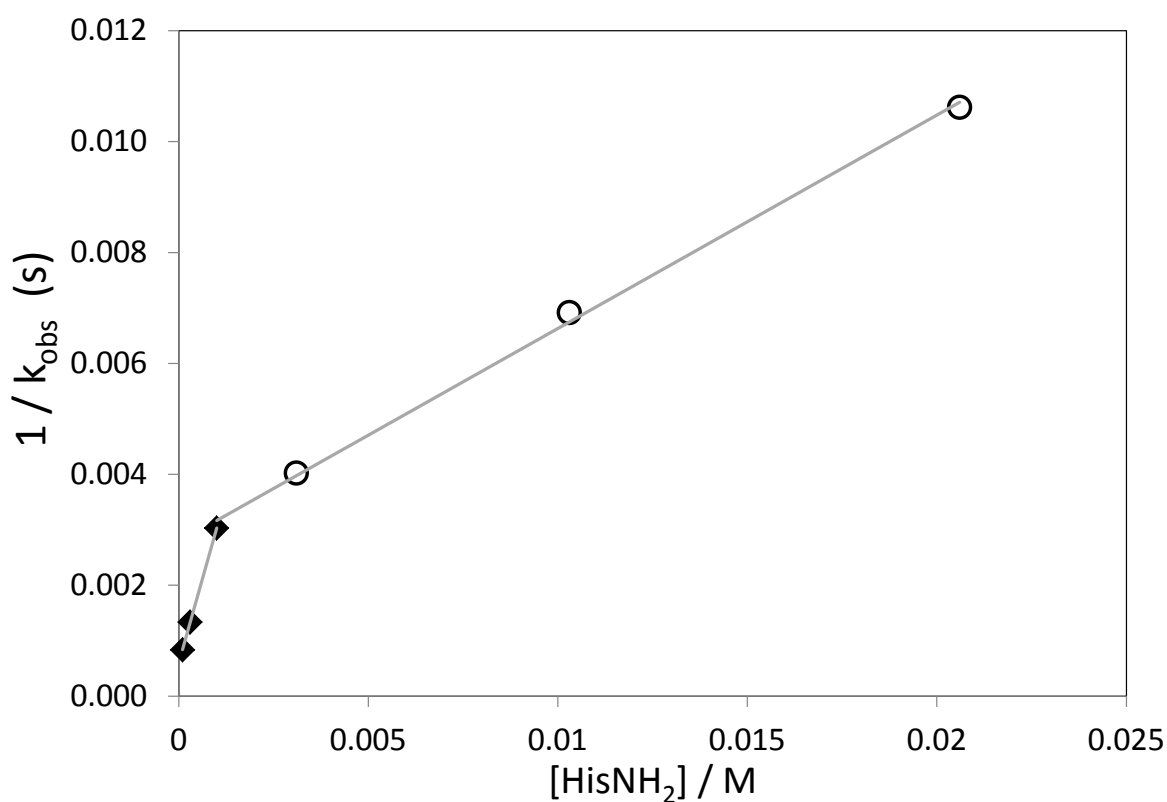

**Fig. S3:** Spectrum of N<sub>2</sub>O saturated aqueous solutions containing 4.1 mM HisNH<sub>2</sub> and 10 % MeOH (v/v) , 2 μs after irradiation (50 Gy, optical pathlength 6 cm). Under these conditions, H-atoms are scavenged quantitatively and the curve is dominated by the adduct of the hydroxymethyl radical to HisNH<sub>2</sub>. Two maxima at around 300 nm and 360 nm are visible. Hydroxymethyl radicals contribute to the observed absorption at  $\lambda < 320$  nm.

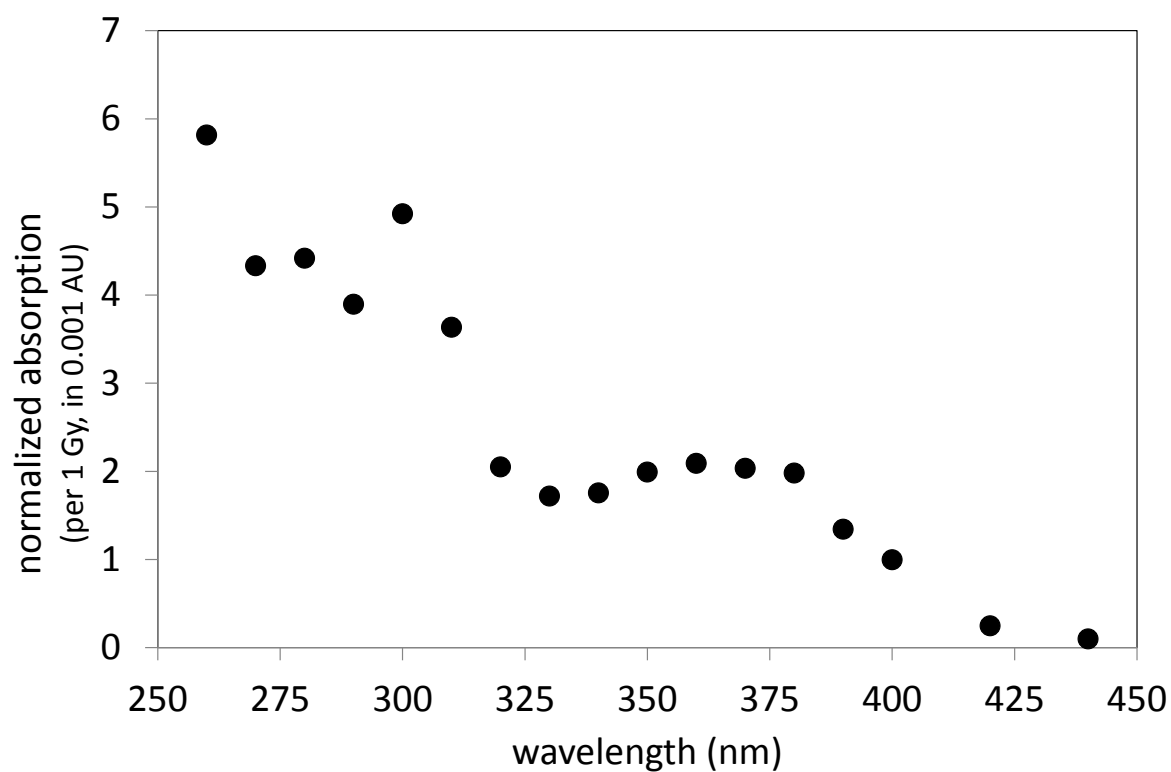

Supplement: c4cc05316h1.pdf [file c4cc05316h1.pdf]
